# Supplementary material
Source: MDPI journal article supplement (https://www.mdpi.com/2077-0472/10/5/173)
Supplement: s1 [file s1]

Supplementary data

# Soil Quality of *Ananas comosus* Cultivation Land in the Papaloapan Basin Region of Mexico after Wastes Addition as Fertilizer Supplement

Ricardo Acevedo-Gómez <sup>1,2</sup>, Miguel Angel Sánchez-Hernández <sup>2</sup>,  
Fernando Carlos Gómez-Merino <sup>3</sup>, Patricia Ponce-Peña <sup>4</sup>, María Azucena González-Lozano <sup>4</sup>,  
Leticia Navarro-Moreno <sup>5</sup> and Martha Poisot <sup>5,\*</sup>

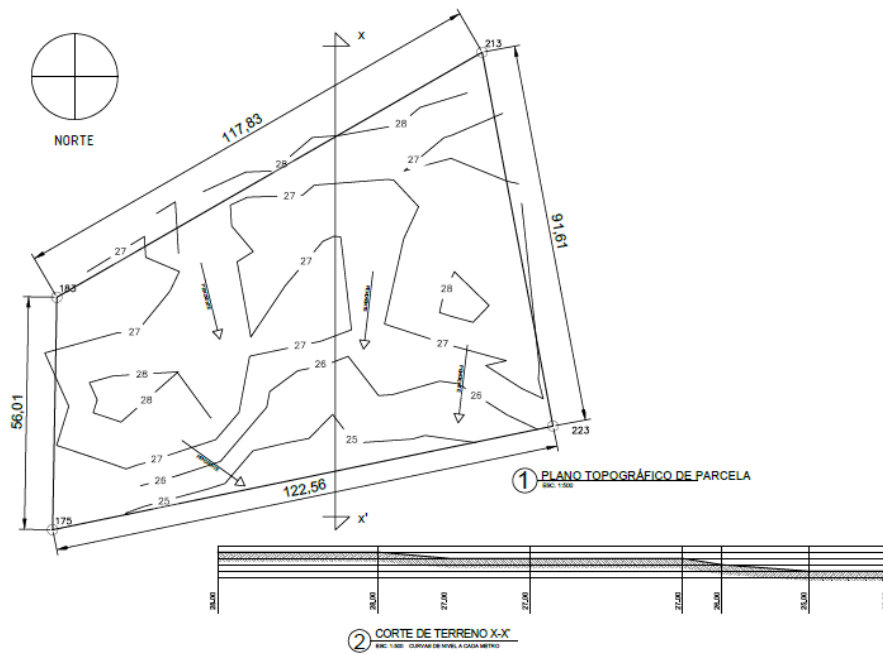

Figure S1. Plot coordinates of P52.

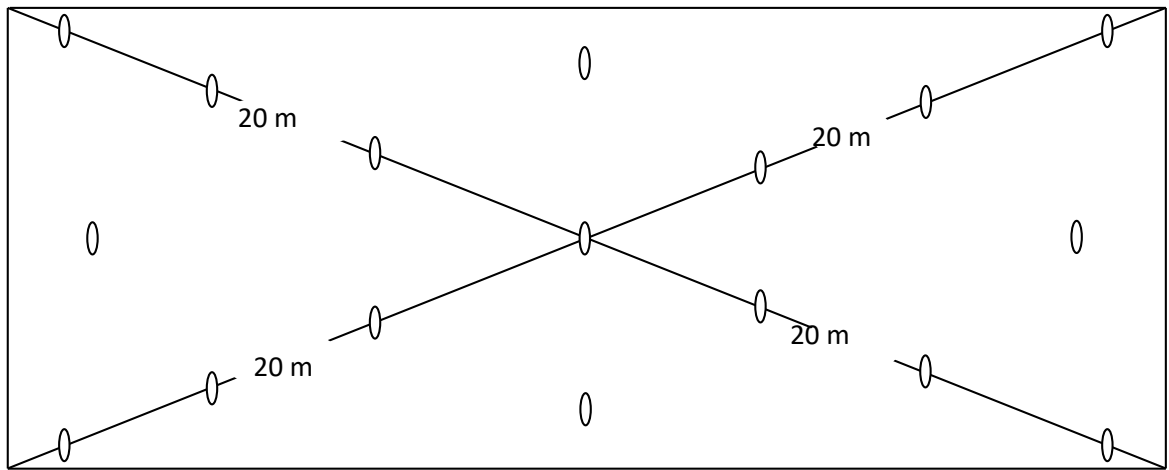

**Figure S2.** Soil sampling in every cultivation field.
